# Supplementary material for: Oncogenic KRAS Confers Chemoresistance by Upregulating NRF2
Source: Oxford University Press journal article supplement (doi:10.1158/0008-5472.can-14-1439), 2014-10-22
Supplement: 00085472can141439-sup-131680_3_supp_2675450_ncfkq8.docx [file 00085472can141439-sup-131680_3_supp_2675450_ncfkq8.docx]

**Table S1. Cisplatin toxicity as a function of KRAS, NRF2, KEAP1, and P53 status.**

| **Cell Line** | **Cisplatin 48h (μM) LD50** | **KRAS** | **NRF2 (Neh2 domain)** | **KEAP1** | **P53** |
| --- | --- | --- | --- | --- | --- |
| **BEAS-2B** | **4.1** | **WT** | **WT** | **WT (**[**1**](#_ENREF_1)**)** | **MU (**[**2**](#_ENREF_2)**)** |
| **HBE** | **9.6** | **WT** | **WT** | **WT** | **WT** |
| **H23** | **4.4** | **G12C** | **WT** | **WT (**[**4**](#_ENREF_4)**)** | **MU (**[**5**](#_ENREF_5)**)** |
| **H292** | **2.3** | **WT** | **WT** | **WT (**[**4**](#_ENREF_4)**)** | **WT (**[**6**](#_ENREF_6)**)** |
| **H838** | **4.8** | **WT** | **WT** | **MU (**[**1**](#_ENREF_1)**)** | **WT (**[**7**](#_ENREF_7)**)** |
| **H1299** | **12.4** | **WT** | **WT** | **WT (**[**4**](#_ENREF_4)**)** | **NO (**[**8**](#_ENREF_8)**)** |
| **H1703** | **17** | **WT** | **WT** | **WT (**[**4**](#_ENREF_4)**)** | **MU (**[**9**](#_ENREF_9)**)** |
| **A549** | **12.4** | **G12D** | **WT** | **MU (**[**1**](#_ENREF_1)**)** | **WT (**[**8**](#_ENREF_8)**)** |
| **Calu-1** | **38.5** | **G12C** | **WT** | **WT (**[**10**](#_ENREF_10)**)** | **NO (**[**11**](#_ENREF_11)**)** |
